# Supplementary material
Source: Springer Nature journal article supplement (https://www.springermedizin.de/resource/supplementary/13034_2007_10_MOESM2_ESM.pdf/9652138)

Figure 2.

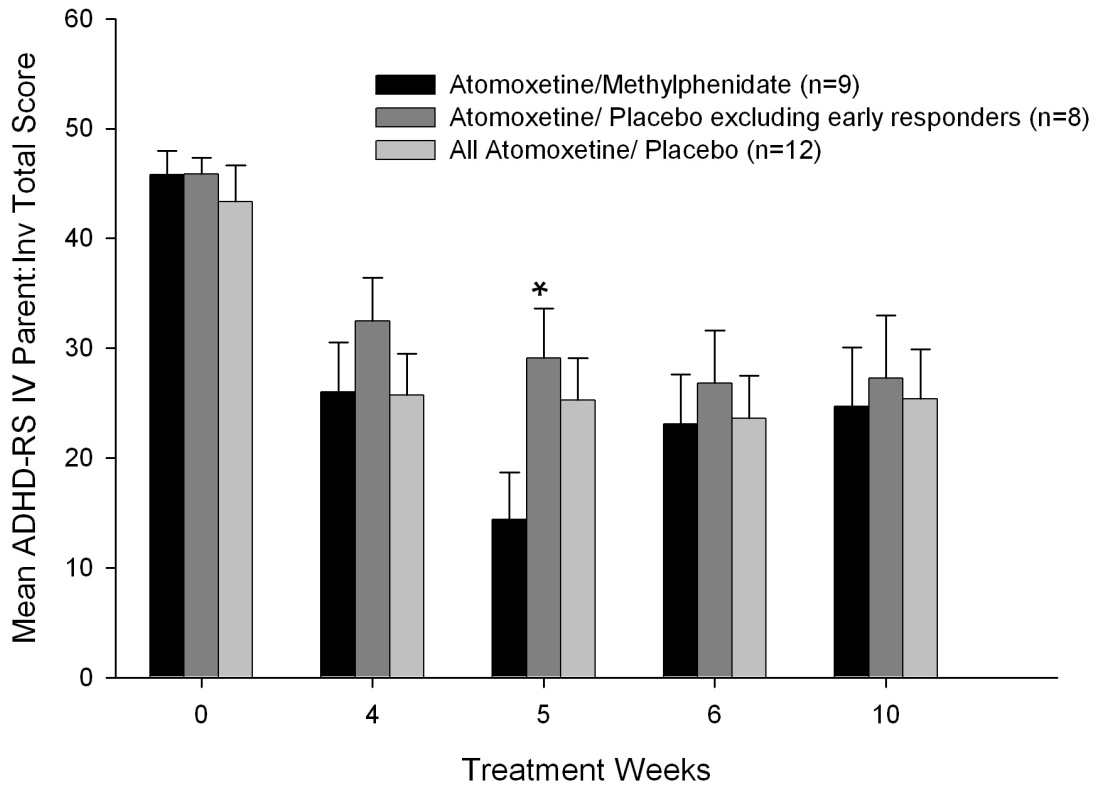

Supplement: MOESM2 [file 9652138]
